# Supplementary material for: Genomic signatures of drift and selection driven by predation and human pressure in an insular lizard
Source: PubMed Central journal article supplement (PMC7971075; doi:10.1038/s41598-021-85591-x), 2021-03-17

a) All loci

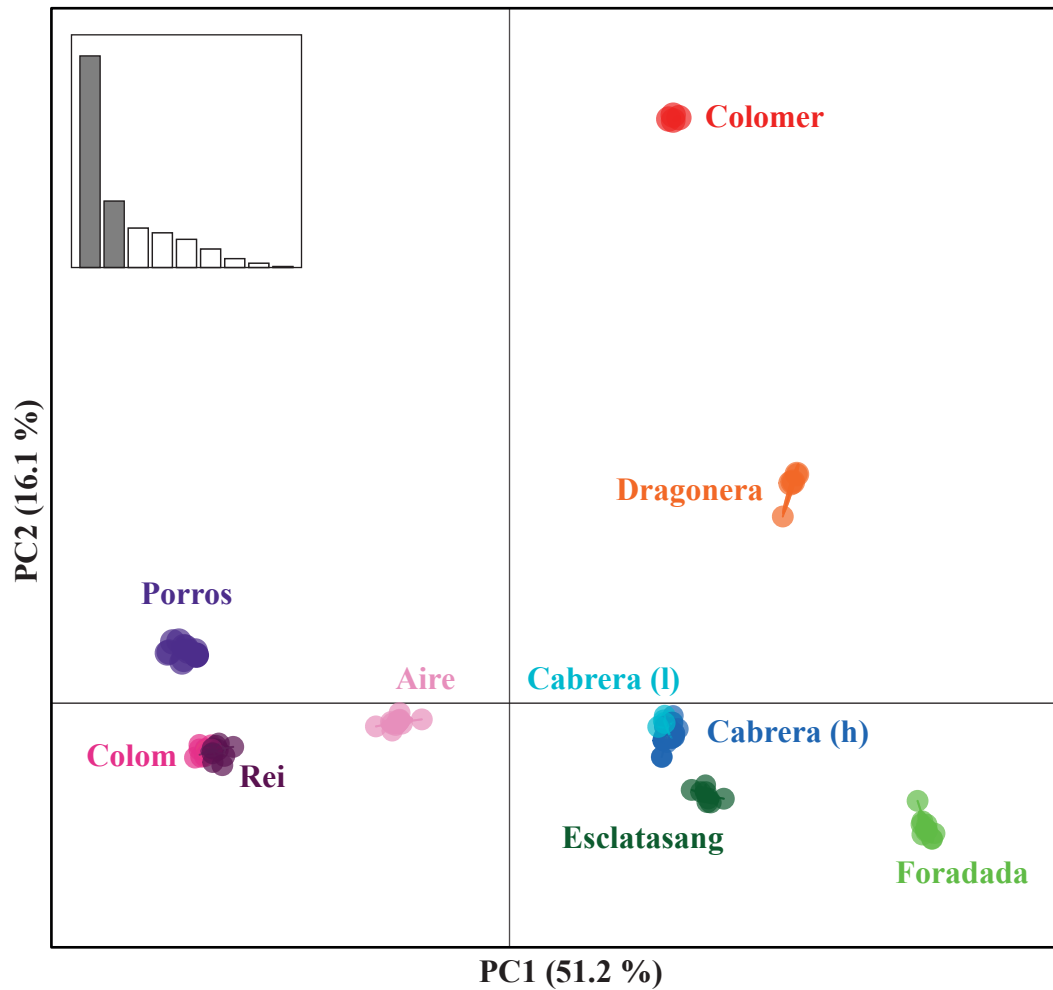

b) Outlier loci

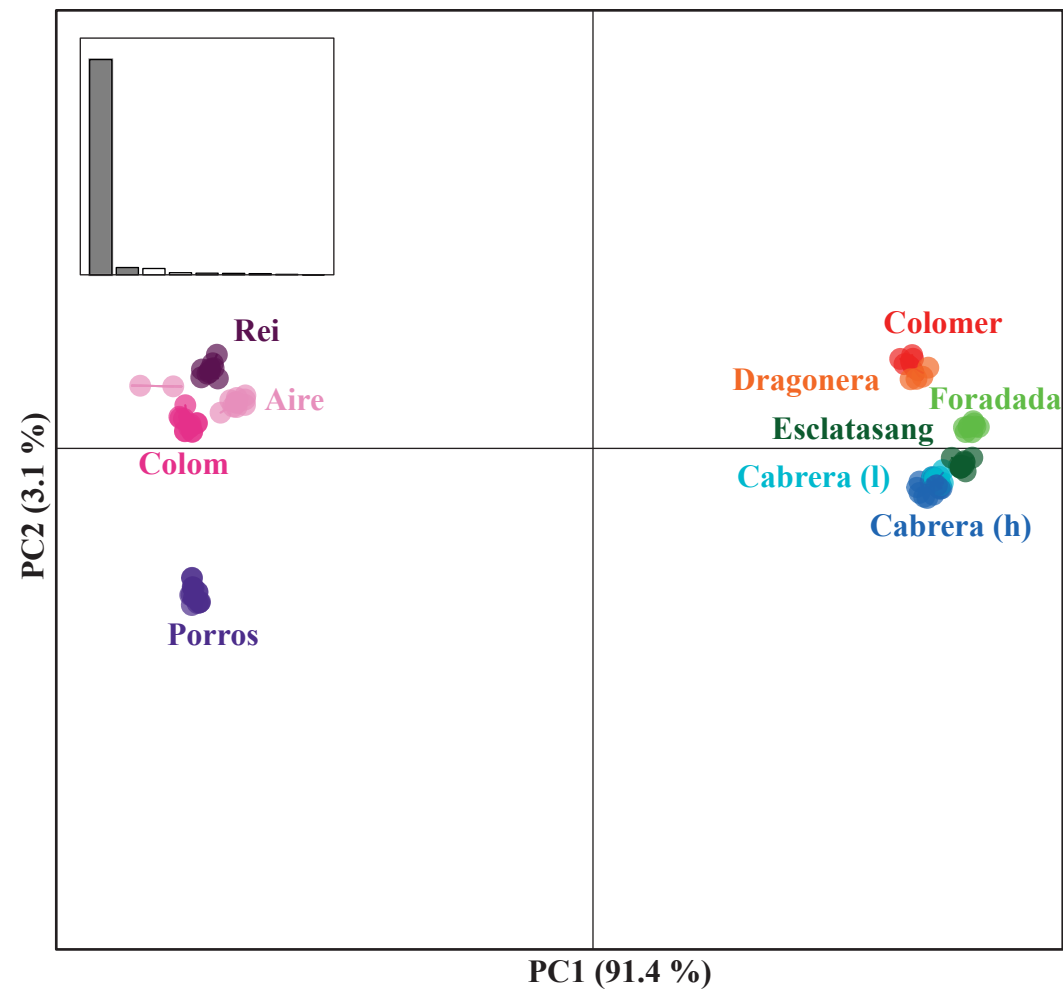

Supplement: 41598_2021_85591_MOESM4_ESM.pdf [file 41598_2021_85591_MOESM4_ESM.pdf]
